# Supplementary material for: Related Endogenous Retrovirus-K Elements Harbor Distinct Protease Active Site Motifs
Source: Front Microbiol. 2018 Jul 18;9:1577. doi: 10.3389/fmicb.2018.01577 (PMC6058741; doi:10.3389/fmicb.2018.01577)
Supplement: Supplementary file 2 [file Data_Sheet_2.ZIP]

Archive with 9 entries (9 files):
- Additional file 48/assignCytobands.plx
- Additional file 48/basic_ltrid_expression_sra.plx
- Additional file 48/checkXYcontent.plx
- Additional file 48/compareALSBreastCancerProstateCancer.sh
- Additional file 48/get_BAM_stats.sh
- Additional file 48/matchUpAssemblies.plx
- Additional file 48/modified_blast.plx
- Additional file 48/modified_hmmer.plx
- Additional file 48/repeatAnalysisOnlyActiveLoci.plx
